# Supplementary material for: Oxidative stress of H2O2on N,N-dimethylglycine: formation of perhydrate crystals and more
Source: Royal Society of Chemistry journal article supplement (doi:10.1039/c4ce01835d), 2014-09-16

Table S1. Crystal data, data collection and structure refinement parameters for crystal structures of **I**, **II** and **III**.

| Crystal structure                                                                           | <b>I</b>                                       | <b>II</b>                                      | <b>III</b>                                    |
|---------------------------------------------------------------------------------------------|------------------------------------------------|------------------------------------------------|-----------------------------------------------|
| Chemical formula                                                                            | C <sub>4</sub> H <sub>11</sub> NO <sub>4</sub> | C <sub>4</sub> H <sub>11</sub> NO <sub>5</sub> | C <sub>4</sub> H <sub>9</sub> NO <sub>3</sub> |
| <i>M<sub>r</sub></i>                                                                        | 137.14                                         | 153.14                                         | 119.12                                        |
| Crystal system                                                                              | orthorhombic                                   | orthorhombic                                   | monoclinic                                    |
| Space group                                                                                 | Pca2 <sub>1</sub>                              | P2 <sub>1</sub> 2 <sub>1</sub> 2               | P2 <sub>1</sub> /n                            |
| Crystal size / mm                                                                           | 0.35x0.3x0.1                                   | 0.3 x 0.1 x 0.1                                | 0.3x0.25x0.09                                 |
| <i>a</i> /Å                                                                                 | 10.3838(5)                                     | 12.3320(4)                                     | 5.5044(7)                                     |
| <i>b</i> /Å                                                                                 | 5.7184(3)                                      | 9.9903(3)                                      | 10.0817(8)                                    |
| <i>c</i> /Å                                                                                 | 11.4118(7)                                     | 5.80218(16)                                    | 10.2203(13)                                   |
| <i>β</i> (°)                                                                                | 90                                             | 90                                             | 93.142(10)                                    |
| <i>V</i> /Å <sup>3</sup>                                                                    | 677.62(6)                                      | 714.83(3)                                      | 566.31(11)                                    |
| <i>Z</i> , <i>Z'</i>                                                                        | 4, 1                                           | 4, 1                                           | 4, 1                                          |
| <i>D<sub>calc</sub></i> /g cm <sup>-3</sup>                                                 | 1.344                                          | 1.423                                          | 1.397                                         |
| <i>μ</i> /mm <sup>-1</sup>                                                                  | 0.120                                          | 0.131                                          | 0.119                                         |
| No. of measured,<br>independent and<br>observed [ <i>I</i> > 2σ( <i>I</i> )]<br>reflections | 7718<br>1383<br>997                            | 11656<br>1782<br>1650                          | 5300<br>1406<br>1061                          |
| <i>θ<sub>min</sub></i> (°)                                                                  | 3.56                                           | 2.62                                           | 2.84                                          |
| <i>θ<sub>max</sub></i> (°)                                                                  | 26.37                                          | 28.28                                          | 28.28                                         |
| Range of                                                                                    |                                                |                                                |                                               |
| <i>h</i>                                                                                    | -12 → 12                                       | -16 → 16                                       | -7 → 7                                        |
| <i>k</i>                                                                                    | -7 → 7                                         | -13 → 13                                       | -13 → 13                                      |
| <i>l</i>                                                                                    | -14 → 14                                       | -7 → 7                                         | -13 → 13                                      |
| <i>R<sub>int</sub></i>                                                                      | 0.0566                                         | 0.0247                                         | 0.0273                                        |
| <i>R</i> [ <i>F</i> <sup>2</sup> > 2σ( <i>F</i> <sup>2</sup> )]                             | 0.0415                                         | 0.0308                                         | 0.0376                                        |
| <i>wR</i> ( <i>F</i> <sup>2</sup> )                                                         | 0.0806                                         | 0.0777                                         | 0.0971                                        |
| <i>S</i>                                                                                    | 1.058                                          | 1.043                                          | 1.032                                         |
| No of parameters                                                                            | 93                                             | 102                                            | 77                                            |
| Restraints                                                                                  | 1                                              | 0                                              | 0                                             |
| Δ <i>ρ<sub>max</sub></i> /eÅ <sup>-3</sup>                                                  | 0.103                                          | 0.199                                          | 0.202                                         |
| Δ <i>ρ<sub>min</sub></i> /eÅ <sup>-3</sup>                                                  | -0.118                                         | -0.118                                         | -0.187                                        |

Figure S1. The main structural motif ("hollow tube") in N-hydroxy-N,N-dimethylglycine perhydrate (**II**). Zigzag chains are highlighted by red and blue, O3-H3O...O4 hydrogen bond is highlighted by green. Intramolecular O3-H3O...O1 hydrogen bond is omitted for clarity.

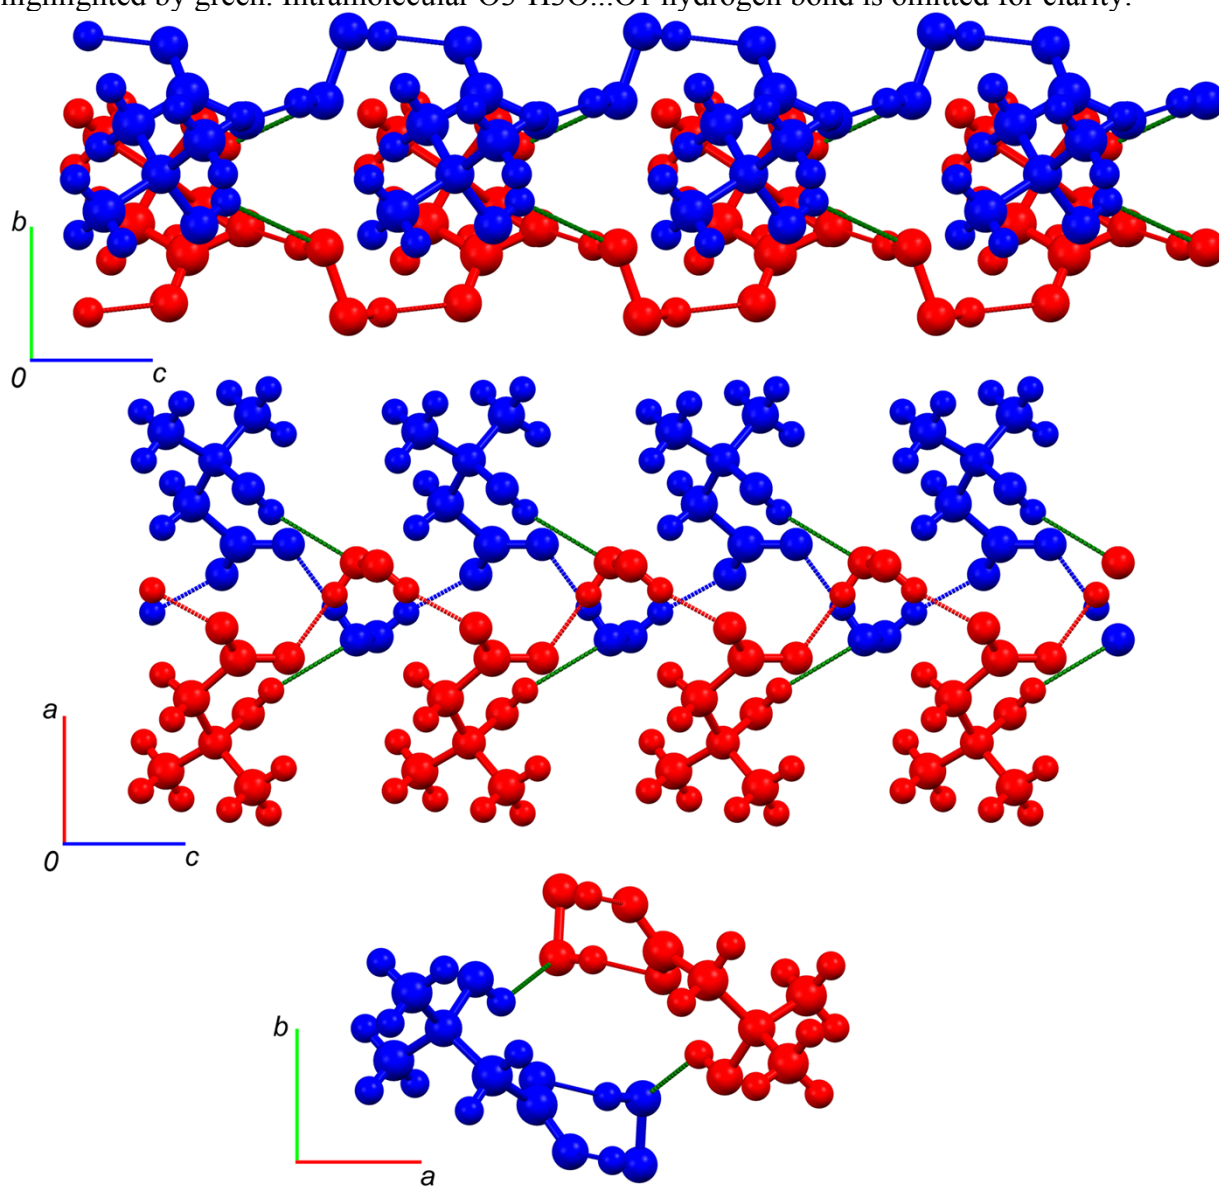

Supplement: c4ce01835d1.pdf [file c4ce01835d1.pdf]
